# Supplementary material
Source: PubMed Central journal article supplement (PMC3491736)

1 **Supplementary Information**

2

3 **Methods**

4

5 **Microscopy.** Smears from participants were evaluated prior to enrollment and scored on a  
6 scale of 0 to 4+ by two microscopists on site. The score is based upon the following scale: 0 is  
7 not infected, 1+ is 1-9 rings per 100 microscope fields, 2+ is 10-100 rings per 100 fields, 3+ is 1-  
8 10 rings per field, and 4+ is >10 rings per field. Participants were required to have a score of 2+  
9 or greater for enrollment.

10

11 **Amplification and Sequencing of *csp*.** DNA from filter paper blood spots was extracted using  
12 the Invitrogen Pro 96 Genomic DNA kit (Invitrogen, Carlsbad, CA). The region of *csp* containing  
13 the TH2 and TH3 epitopes was amplified using previously described primers [1], which we  
14 modified for 454 sequencing by inclusion of a linker, tag and a Multiplex Identifier (MID)  
15 sequence. The samples were amplified on an Eppendorf Master cycler (Eppendorf,  
16 Hauppauge, NJ) under the conditions previously described using Roche FastStart High fidelity  
17 Taq (Roche, Madison, WI) [1]. PCR amplicons were purified using the Purelink PCR purification  
18 kit (Invitrogen). Final quality (OD > 1.8) was checked and concentration determined using a  
19 Nanodrop 1000 spectrophotometer (Thermo Scientific, Waltham, MA). Amplicons were pooled  
20 and sequenced on a 454 Life Sciences sequencer using the Titanium chemistry at the UNC  
21 High Throughput Sequencing Facility.

22

23 **Definition of TH2 and TH3 epitopes.** Within our amplicon, TH2 was defined as nt121-156 and  
24 TH3 was defined as nt223-258. These correspond to nt946-981 and nt1048-1083 in strain 3d7  
25 (PFC0210c), as well as nt1068-1103 and nt1170-1205 in strain 7g8 (K02194.1).

26

1 **Haplotype determination from ultra-deep sequencing.** Sequence, flow cell intensities, and  
2 base quality scores were extracted from the sff files using the program sffinfo (454 Life  
3 Sciences). An in-house Perl program pyro\_tools was used to process the raw sffinfo text output  
4 sorting and return high quality sequences for haplotype prediction. In this program, we first  
5 identified and removed the tag, MID and forward primer, requiring all to exactly match without  
6 error. Based on the MID and plate location, reads were sorted into the distinct amplicons (the 2  
7 PCR amplifications per participant). As 454 sequencing error rate increases over the length of  
8 the read, we sought to minimize the inclusion of poor quality sequences by concurrently  
9 trimming low quality sequence from the 3'-end of reads. Low quality sequence was determined  
10 by two measures: the default trim position as defined by the 454 base calling software and by  
11 direct examination of the underlying flow intensities. For the latter, the trim position was the third  
12 instance of a noisy fluorescent signal intensity, which was/were defined as flows with intensities  
13 between 0.4 and 0.7 or between 1.2 and 1.6 [2]. We also trimmed the reads to remove the  
14 reverse primer sequence identified with blast2seq (National Center for Biotechnology  
15 Information, NCBI). Finally, we required that trimmed reads represent at least 200 bases of the  
16 amplified region in order to ensure that each read provided adequate haplotypic information to  
17 facilitate accurate ShoRAH prediction. Combined this filtering produced high-quality read sets  
18 representing individual PCR amplicons (2 per participant). These were further analyzed by  
19 ShoRAH (**S**hort **R**ead **A**ssembly into **H**aplotypes) to predict the most likely haplotypes within the  
20 patient [3]. ShoRAH is a Bayesian model treating reads as discrete samples from a sequencing  
21 process which is error prone. A local analysis was performed using this software to correct for  
22 sequencing errors by clustering all reads that overlap the same region of the genome of length  
23 approximately equal to the read length [3]. The consensus sequence of each cluster represents  
24 the true haplotype from which the erroneous reads are predicted to emanate [3]. The number of  
25 reads associated with the cluster estimates the prevalence of the haplotype in the population  
26 [3]. We removed improbable haplotypes (ShoRAH posterior probability <0.9) and further

1 refined the number of reads representing each high-probability haplotype by assigning each  
2 read to its most similar haplotype based on global optimal pairwise alignment (Needleman-  
3 Wunsch algorithm as implemented in the program *needleall* in EMBOSS suite [4].

4  
5 ShoRAH is limited in that it models a uniform error rate across the sequence. This leads to  
6 spurious haplotypes due to differences in 3' sequence—particularly in terms of indels. To  
7 correct for this, we heuristically clustered the predicted ShoRAH haplotypes for each participant  
8 (the combined haplotypes from the two independent amplicon). Clustering was based on  
9 differences determined by pairwise global alignments between haplotypes. As haplotypes were  
10 clustered, further pairwise alignments were then based on the consensus sequence as  
11 determined from a *clustalw* multiple alignment [5] weighted for the number of reads represented  
12 by each ShoRAH haplotype within a given cluster. The clustering was done in a stepwise  
13 manner allowing for increasing degree of differences reasoning that the vast majority of errors  
14 would separate sequences from the true haplotype by only a few differences. Clustering  
15 proceed from the smallest (based on the number of reads) to largest. In the case of a cluster  
16 that was equally distant from two or more clusters, the assignment was to the largest cluster.  
17 We allowed up to a single substitution and five small insertion/deletions of up to two bases,  
18 which would be biologically implausible in this indispensable/required gene, as they would result  
19 in frame shifts. As each sample was amplified in duplicate and sequenced independently, we  
20 required that the final haplotype cluster be composed of initial ShoRAH haplotypes from both  
21 amplicons. The haplotype clusters were also required to represent  $\geq 1\%$  of the total reads for a  
22 participant.

23  
24 To examine haplotypes at the population level, heuristic clustering and consensus determination  
25 was performed as above across the combined haplotypes from all individuals excepting that  
26 substitutions were not allowed (only small indels). The vast majority differences were due to one

1 or two small indels. The resulting weighted consensi provided the final haplotypes for analysis  
2 and was assigned a unique population identifier (pUID).

3

4 **Data Analysis.** The final haplotypes were stored, managed and analyzed in Microsoft Access  
5 2007 and Microsoft Excel 2007 (Microsoft, Seattle, WA). DNA alignments and figures were  
6 generated using MegAlign and GeneVison software (DNASTar, Madison, WI). Additional figures  
7 were generated using Graphpad Prism v5 (GraphPad Software Inc., La Jolla, CA). Ecological  
8 indexes of diversity and rarefaction curves were determined using EstimateS v8.2 [6]. The  
9 rarefaction curves were made using the Mao Tao estimator as described in EstimateS [6-7].  
10 Calculations of molecular diversity and evolution were done using Arlequin v3.5.1.2 and DnaSP  
11 v5.0 [8-9]. DnaSP was used to calculate  $F_u$  and  $Li D^*$ ,  $F_u$  and  $Li F^*$ , and Tajima  $D$ . Arlequin was  
12 used to determine mean pairwise differences, theta estimators of molecular diversity, allele  
13 frequencies, expected heterozygosity, inter-haplotypic distance matrices and nucleotides under  
14 selection. Nucleotides under selection were detected using coalescent simulations to get p-  
15 values of locus specific F-statistics conditioned on observed levels of heterozygosity [9-10].  
16 Since a single population structure was used (total parasite population), a non-hierarchical finite  
17 island model was used with 20,000 simulations [9]. The Median-Joining Network was created  
18 using DNA Alignment v1.2.1.1 and Network v4.6.0.0 [11].

19

20 For this study, we were primarily interested in the diversity of CS. Therefore, multiplicity of  
21 infection (MOI) has been defined as the number of different CS variant contained within an  
22 individual infection. This may be an under representation of the true MOI for two reasons. First,  
23 CS is not as highly diverse as other surface antigens traditionally used for studying diversity,  
24 such as merozoite surface protein-2. Second, single locus genotyping has the potential to  
25 under represent diversity due to variants having a similar genotype at the locus studied, which  
26 are divergent at additional sites.

## 1 **References**

2

3 1. Allouche A, Silveira H, Conway DJ, et al. High-throughput sequence typing of T-cell epitope  
4 polymorphisms in Plasmodium falciparum circumsporozoite protein. Mol Biochem Parasitol  
5 **2000**; 106:273-82.

6 2. Quinlan AR, Stewart DA, Stromberg MP, Marth GT. Pyrobayes: an improved base caller for  
7 SNP discovery in pyrosequences. Nat Methods **2008**; 5:179-81.

8 3. Zagordi O, Bhattacharya A, Eriksson N, Beerenwinkel N. ShoRAH: estimating the genetic  
9 diversity of a mixed sample from next-generation sequencing data. BMC Bioinformatics **2011**;  
10 12:119.

11 4. Rice P, Longden I, Bleasby A. EMBOSS: the European Molecular Biology Open Software  
12 Suite. Trends Genet **2000**; 16:276-7.

13 5. Thompson JD, Higgins DG, Gibson TJ. CLUSTAL W: improving the sensitivity of progressive  
14 multiple sequence alignment through sequence weighting, position-specific gap penalties and  
15 weight matrix choice. Nucleic Acids Res **1994**; 22:4673-80.

16 6. Colwell RK. EstimateS: Statistical estimation of species richness and shared species from  
17 samples. Available at: <http://viceroy.eeb.uconn.edu/estimates>. 2011.

18 7. Colwell RK, Mao CX, Chang J. Interpolating, extrapolating and comparing incidence-based  
19 species accumulation curves. Ecology **2005**; 85:2717-2727.

20 8. Librado P, Rozas J. DnaSP v5: a software for comprehensive analysis of DNA polymorphism  
21 data. Bioinformatics **2009**; 25:1451-2.

22 9. Excoffier L, Lischer HE. Arlequin suite ver 3.5: a new series of programs to perform  
23 population genetics analyses under Linux and Windows. Mol Ecol Resour **2010**; 10:564-7.

24 10. Excoffier L, Hofer T, Foll M. Detecting loci under selection in a hierarchically structured  
25 population. Heredity **2009**; 103:285-98.

1 11. Bandelt HJ, Forster P, Rohl A. Median-joining networks for inferring intraspecific  
2 phylogenies. *Mol Biol Evol* **1999**; 16:37-48.

3

4

5

1 **Figure S1. Genetic Variation and Selection of *csp* Haplotypes in Adults and Children.**

2 Panel A. shows the relative genetic distance between haplotypes found in adult participants in  
3 the study. The figure represents the number of pairwise differences between all variants found  
4 in the population. Differences between variants appear to be diffuse among the population,  
5 with no specific variants being more distant than others. Panel B. show a similar figure for  
6 variants found in children. Panel C shows the expected heterozygosity ( $H_e$ ) for the 24  
7 polymorphic loci identified in the parasite population. Panel D shows loci under selection from  
8 genome scans based on  $F_{st}$ . Using Arlequin and based on the methods described by Excoffier,  
9 there were only 8 sites showing evidence of selection [9-10]. Four sites (loci 124, 138, 154 and  
10 229, red dots) all had p-values of <1%. The other 4 sites (136, 145, 243 and 257, blue dots) all  
11 had p-value<5%. These loci correspond to nucleotides 949, 961, 963, 970, 979, 1054, 1068  
12 and 1082 in the 3d7 strain of falciparum (PFC0210c). Of these, 5 loci fall in the TH2 epitope  
13 (nucleotides 114-155) and three fall in the TH3 epitope (nucleotides 227-258).

14

15

16

**Table S1. Allele Frequency of Polymorphic Sites**

| <b>Nucleotide</b> | <b># of Alleles</b> | <b>Allele Frequency</b> |            |            |            |
|-------------------|---------------------|-------------------------|------------|------------|------------|
| 69                | 2                   | T : 0.8771              | A : 0.1229 |            |            |
| 71                | 2                   | C : 0.9902              | G : 0.0098 |            |            |
| 77                | 2                   | A : 0.9220              | G : 0.0780 |            |            |
| 115               | 2                   | C : 0.3830              | A : 0.6170 |            |            |
| 124               | 2                   | G : 0.8147              | A : 0.1853 |            |            |
| 125               | 2                   | A : 0.9560              | C : 0.0440 |            |            |
| 127               | 3                   | A : 0.3886              | C : 0.3993 | G : 0.2121 |            |
| 133               | 2                   | T : 0.9921              | A : 0.0079 |            |            |
| 136               | 2                   | A : 0.9990              | C : 0.0010 |            |            |
| 138               | 2                   | G : 0.7749              | C : 0.2251 |            |            |
| 139               | 2                   | A : 0.9599              | G : 0.0401 |            |            |
| 140               | 4                   | T : 0.1135              | C : 0.3822 | A : 0.4110 | G : 0.0933 |
| 145               | 2                   | C : 0.7602              | A : 0.2398 |            |            |
| 146               | 2                   | A : 0.9942              | G : 0.0058 |            |            |
| 154               | 2                   | C : 0.7917              | A : 0.2083 |            |            |
| 229               | 2                   | A : 0.8891              | G : 0.1109 |            |            |
| 230               | 2                   | A : 0.9740              | G : 0.0260 |            |            |
| 235               | 2                   | C : 0.9801              | T : 0.0199 |            |            |
| 241               | 2                   | G : 0.9791              | A : 0.0209 |            |            |
| 243               | 2                   | C : 0.9986              | A : 0.0014 |            |            |
| 244               | 2                   | C : 0.6761              | G : 0.3239 |            |            |
| 250               | 2                   | G : 0.8687              | A : 0.1313 |            |            |
| 256               | 2                   | G : 0.9619              | A : 0.0381 |            |            |



|     |   |            |            |            |  |
|-----|---|------------|------------|------------|--|
| 257 | 3 | C : 0.5190 | A : 0.4429 | T : 0.0381 |  |
|-----|---|------------|------------|------------|--|

Panel A

Inter-haplotype distance matrix  
Lilongwe csp variants adult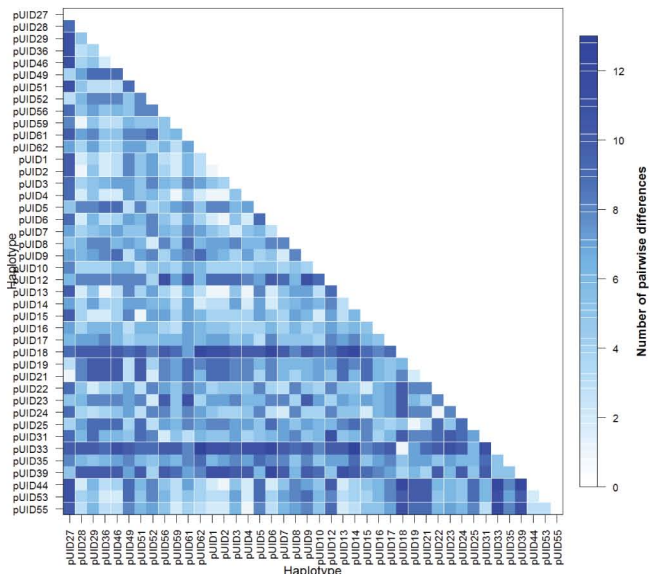

Panel C

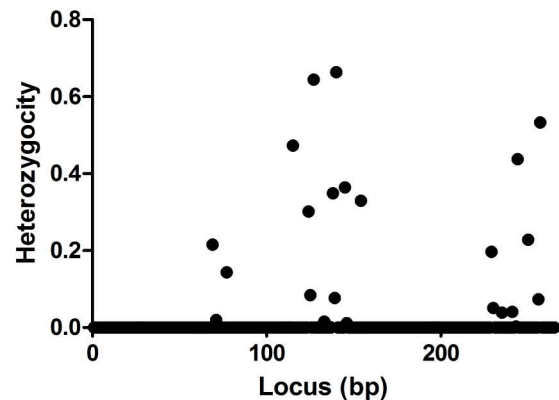

Panel B

Inter-haplotype distance matrix  
Lilongwe csp variants kids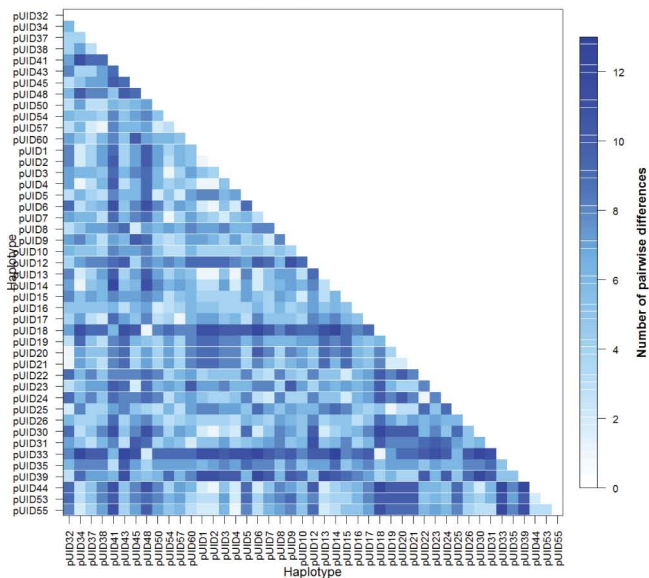

Panel D

Detection of loci under selection from genome scans based on  $F_{ST}$ 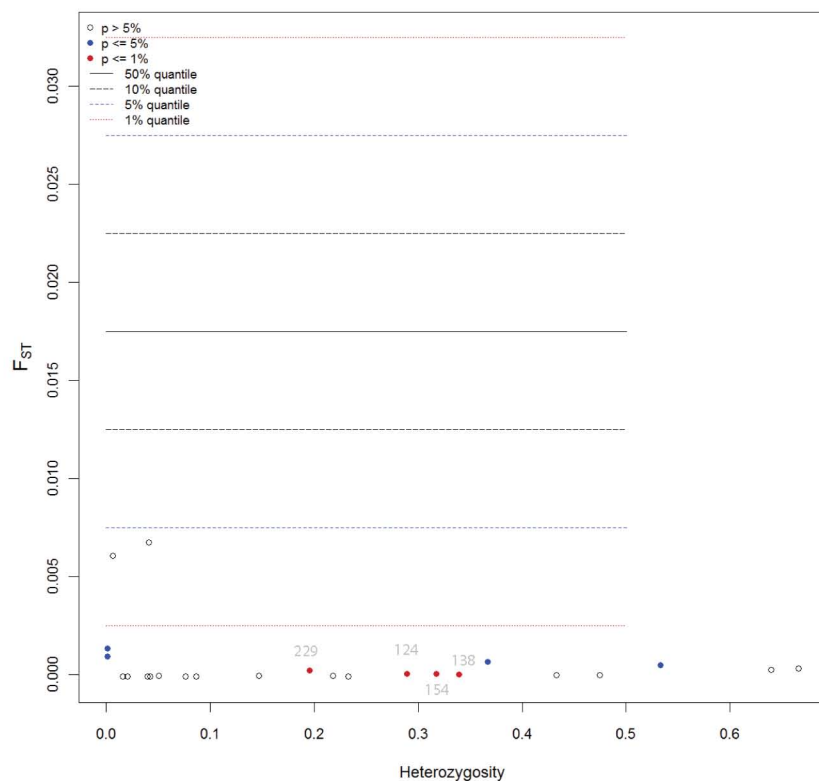

Supplement: supp_jis329_jis329supp.pdf [file supp_jis329_jis329supp.pdf]
